# Supplementary material for: Oxygen uptake efficiency plateau is unaffected by fitness level - the NOODLE Study
Source: Research Square preprint supplement (doi:10.21203/rs.3.rs-4085504/v1), 2024-06-17
Supplement: Supplementary file 2 [file c91d8dda85e5ace03d8b1b0a.docx]

Table S2. Participants demographic and exercise characteristics.

| **Variable** | **Total population [*N*=140]** | **Males**  **[*N*=77]** | **Females**  **[*N*=63]** |
| --- | --- | --- | --- |
|
| **Age (years)** | 22.7 ± 4.6 | 21.8 ± 4.8 | 23.8 ± 4.2 |
| **Height (cm)** | 174.8 ± 9.9 | 181.6 ± 6.3 | 166.3 ± 6.2 |
| **Weight (kg)** | 69.3 ± 10.1 | 76.1 ± 7.6 | 61.0 ± 5.5 |
| **BMI (kg·m−2)** | 22.6 ± 1.7 | 23.1 ± 1.7 | 22.1 ± 1.6 |
| **HR (beats·min−1)** | 190.9 ± 8.9 | 190.8 ± 8.7 | 191.0 ± 9.1 |
| **VE (L·min−1)** | 154.5 ± 34.1 | 176.3 ± 26.3 | 127.8 ± 21.1 |
| **VO2peak (L·min−1)** | 3.86 ± 0.82 | 4.40 ± 0.64 | 3.21 ± 0.48 |
| **VO2peak/kg (mL·kg−1min−1)** | 55.2 ± 8.6 | 57.8 ± 9.0 | 52.1 ± 7.0 |
| **% pred. VO2peak** | 144.5 ± 25.9 | 161.4 ± 21.8 | 130.6 ± 20.2 |
| **VCO2 (L·min−1)** | 4.36 ± 0.96 | 5.00 ± 0.72 | 3.57 ± 0.52 |
| **RR (breaths·min−1)** | 60.0 ± 7.6 | 59.9 ± 8.3 | 60.2 ± 6.7 |
| **VT (L)** | 2.81 ± 0.64 | 3.22 ± 0.53 | 2.30 ± 0.32 |
| **RER (VO2/VCO2)** | 1.14 ± 0.05 | 1.15 ± 0.05 | 1.13 ± 0.05 |
| **O2P (VO2/HR)** | 20.7 ± 4.4 | 23.5 ± 3.3 | 17.3 ± 3.0 |
| **Ramp time (minutes)** | 21.3 ± 2.6 | 21.4 ± 2.6 | 21.1 ± 2.7 |
| **Workload (watts)** | 320.4 ± 76.2 | 364.4 ± 70.0 | 266.7 ± 40.8 |
| **OUES (mL·min−1/L·min−1)** | 3.96 ± 0.90 | 4.41 ± 0.87 | 3.41 ± 0.58 |
| **OUEP (mL·L−1)** | 42.7 ± 4.7 | 44.2 ± 4.2 | 41.0 ± 4.8 |

Abbreviations: BMI, body mass index; HR, peak heart rate; VE, peak minute ventilation; VO2peak, peak oxygen uptake; VCO2, peak carbon dioxide output; RR, peak respiratory rate;VT, tidal volume; RER, peak respiratory exchange ratio; O2P, peak oxygen pulse; OUES, oxygen uptake efficiency slope; OUEP, oxygen uptake efficiency plateau.

Note: Measures are presented as: mean ± standard deviation. RER was calculated from VO2/VCO2 from the same 15-sec interval at the end of exercises. O2P was calculated from VO2/HR in the same 15-sec period. OUES was calculated from VO2/VElog during whole exercise effort. OUEP was considered as the highest continuous 90-sec average from the VO2/VE ratio. Predicted VO2peak was calculated from Wassermann & Hansen equation.
